# Supplementary material for: Prevalence of Psychotic Symptoms: In Reply
Source: Atypon-hosted journal article supplement (doi:10.1176/appi.ps.650203r), 2014-02-01
Supplement: 270a_ds001.pdf [file 270a_ds001.pdf]

**Table 1. Characteristics of respondents in the Collaborative Psychiatric Epidemiology Survey, by percentage reporting psychotic symptoms**

| Characteristic           | 12-month prevalence of any psychotic symptoms |         |       |
|--------------------------|-----------------------------------------------|---------|-------|
|                          | %                                             | 95% CI  | p     |
| <b>Race</b>              |                                               |         | <.001 |
| Asian                    | 1.8                                           | 1.2-2.8 |       |
| Latino                   | 3.4                                           | 2.6-4.5 |       |
| Black                    | 4.5                                           | 3.7-5.4 |       |
| White                    | 2.2                                           | 1.6-3.0 |       |
| Other                    | 0.3                                           | .1-2.0  |       |
| <b>Sex</b>               |                                               |         | 0.56  |
| Male                     | 2.7                                           | 2.0-3.5 |       |
| Female                   | 3.0                                           | 2.4-3.6 |       |
| <b>Age</b>               |                                               |         | 0.03  |
| 18-25                    | 3.6                                           | 2.5-5.1 |       |
| 26-45                    | 3.4                                           | 2.7-4.4 |       |
| 46-65                    | 2.2                                           | 1.5-3.2 |       |
| >65                      | 1.7                                           | .9-3.0  |       |
| <b>Marital Status</b>    |                                               |         | <.001 |
| Married                  | 1.7                                           | 1.3-2.3 |       |
| Not Married              | 4.4                                           | 3.5-5.4 |       |
| <b>Education (years)</b> |                                               |         | 0.40  |
| 0-11                     | 3.5                                           | 2.5-4.8 |       |
| 12                       | 2.5                                           | 1.8-3.3 |       |
| 13-15                    | 2.7                                           | 2.1-3.6 |       |
| >=16                     | 2.8                                           | 1.9-4.0 |       |
| <b>Income</b>            |                                               |         | <.001 |
| <\$22,500                | 4.2                                           | 3.3-5.3 |       |
| >=\$22,500               | 2.3                                           | 1.9-2.9 |       |
| <b>Region</b>            |                                               |         | 0.05  |
| Northeast                | 2.1                                           | 1.4-3.2 |       |
| Midwest                  | 3.6                                           | 2.5-5.1 |       |
| South                    | 2.3                                           | 1.9-2.9 |       |
| West                     | 3.4                                           | 2.6-4.6 |       |

N=11,615. Data were adjusted for weighting and design effects. All data were not available for all subjects.

**Table 2. Psychological factors of respondents in the Collaborative Psychiatric Epidemiology Surveys, by percentage reporting psychotic symptoms**

**12-month prevalence of any  
psychotic symptoms**

| <b>Psychological factors</b>                    | <b>%</b> | <b>95% CI</b> | <b>p</b> |
|-------------------------------------------------|----------|---------------|----------|
| <b>Higher distress</b>                          |          |               | <.001    |
| No                                              | 1.2      | .8-1.8        |          |
| Yes                                             | 4.3      | 3.7-5.0       |          |
| <b>Dysfunction days present in past 30 days</b> |          |               | 0.03     |
| 0-2 days                                        | 2.3      | 1.8-2.9       |          |
| 3-30 days                                       | 3.8      | 2.5-5.8       |          |
| <b>Lifetime substance use disorder</b>          |          |               | <.001    |
| No                                              | 2.5      | 2.1-3.0       |          |
| Yes                                             | 5.2      | 3.7-7.2       |          |
| <b>Lifetime posttraumatic stress disorder</b>   |          |               | <.001    |
| No                                              | 2.5      | 2.1-3.0       |          |
| Yes                                             | 7.6      | 5.6-10.2      |          |

N=11,615. Data were adjusted for weighting and design effects. All data were not available for all subjects.

**Table 3. Logistic regression analysis of characteristics associated with 12-month prevalence of psychotic symptoms among respondents in the Collaborative Psychiatric Epidemiology Surveys**

| Characteristic                                                 | 12-month prevalence |           |
|----------------------------------------------------------------|---------------------|-----------|
|                                                                | OR                  | 95% CI    |
| Race (reference: white)                                        |                     |           |
| Asian                                                          | 0.9                 | .5-1.7    |
| Latino                                                         | 1.7                 | 1.004-2.8 |
| Black                                                          | 3.5                 | 1.6-7.4   |
| Other                                                          | 0.1                 | 0-0.5     |
| Female (reference: male)                                       | 0.8                 | .5-1.2    |
| Age (reference: >65)                                           |                     |           |
| 18-25                                                          | 1.4                 | .6-3.5    |
| 26-45                                                          | 1.9                 | .7-5.3    |
| 46-65                                                          | 1.2                 | .4-3.3    |
| Not Married (reference: married)                               | 2.5                 | 1.5-4.1   |
| Education (reference: ≥ 16)                                    |                     |           |
| 0-11 years                                                     | 0.8                 | .3-2.0    |
| 12 years                                                       | 0.8                 | .4-1.4    |
| 13-15 years                                                    | 0.8                 | .4-1.5    |
| Income Level <\$22,500 (reference: ≥ \$22,500)                 | 1.2                 | .7-2.1    |
| Region (reference: West)                                       |                     |           |
| Northeast                                                      | 0.5                 | .3-1.0    |
| Midwest                                                        | 0.9                 | .5-1.7    |
| South                                                          | 0.6                 | .4-0.9    |
| Lifetimes substance use disorder (reference: no)               | 1.3                 | .8-2.0    |
| Lifetime posttraumatic stress disorder (reference: no)         | 1.8                 | 1.1-3.2   |
| Higher Distress (reference: no)                                | 3.0                 | 1.7-5.2   |
| Dysfunction on 3-30 days in past 30 days (reference: 0-2 days) | 1.2                 | .8-2.0    |

N=11,615. Data were adjusted for weighting and design effects. All data were not available for all subjects.
